# Supplementary material for: A Study on the Planarian Model Confirms the Antioxidant Properties of Tameron against X-ray- and Menadione-Induced Oxidative Stress
Source: MDPI journal article supplement (doi:10.3390/antiox12040953), 2023-04-18
Supplement: s1 [file s1]

## Supplementary Materials

**Table S1.** Selected gene groups for RT-PCR analysis of neoblast marker genes.

| Gene name           | Description                                                             | NCBI<br>Reference<br>Sequence | Primer F                    | Primer R                     |
|---------------------|-------------------------------------------------------------------------|-------------------------------|-----------------------------|------------------------------|
| <i>smcd-hnf-4</i>   | olfactory receptor 4C6 [Homo sapiens]                                   | JF802199.1                    | CGACGCGTTAGACGCATAGAC       | GCTTCCTCGATGCAATATCCAT       |
| <i>Smed-gata456</i> | transcription factor GATA-6 [Homo sapiens]                              | JF802198.1                    | TGTGTGAACTGTGGAGCTAGCAA     | TTGAGAGAACCTGTTCGCATTTCAT    |
| <i>Smed-prox-1</i>  | prospero homeobox protein 1 [Homo sapiens]                              | JQ425149.1                    | TCATTTACGAAAGGCCAAACTTATG   | TTGTAGAACGTGATATCAGGAAAATAGC |
| <i>Smed-soxB-1</i>  | transcription factor SOX-2 [Homo sapiens]                               | JX091078.1                    | CACCAGCTTGGCAGAGAGATG       | GCATAACCGGACGCCAGAT          |
| <i>Smed-pbx-1</i>   | pre-B-cell leukemia transcription factor 3 isoform 1 [Homo sapiens]     | KC353351.1                    | CCGCTCAAATAAAATTCGGAAGAT    | TCCAGTTACACCTTCAGCAATAAGC    |
| <i>Smed-inx-13</i>  | pannexin-2 isoform 1 [Homo sapiens]                                     | JQ425145.1                    | TTGTTCCAGGGCGTTTCG          | CCTCTCCGGCAAAGATTGG          |
| <i>Smed-smad6/7</i> | mothers against decapentaplegic homolog 7 isoform 4 [Homo sapiens]      | JQ278719.1                    | GACTGACGACAAACTGGAAATCG     | CTTTAGCAGCATCCAGTGCAATT      |
| <i>Smed-soxP-2</i>  | transcription factor SOX-5 isoform c [Homo sapiens]                     | JQ425152.1                    | CGATTGATATAATCTGTCATGCTGTTG | CACGCCCTGAATACGACATTG        |
| <i>Smed-nlk-1</i>   | serine/threonine-protein kinase NLK [Homo sapiens]                      | JQ425157.1                    | CCCAAGAGGTTGTGACCCAATA      | CCACATGTTCGACAGCGAATG        |
| <i>Smed-soxP-3</i>  | transcription factor SOX-9 [Homo sapiens]                               | JQ425153.1                    | CTGTTCGATTGGCTGGAAACC       | CCGGCCTCGATCAATTACAA         |
| <i>Smed-egr-1</i>   | E3 SUMO-protein ligase EGR2 isoform b [Homo sapiens]                    | JQ425156.1                    | GCCGTGTCCGCTCATCAG          | CGGCGAGAAGCCTTATTCCT         |
| <i>Smed-zfp-1</i>   | zinc finger protein 701 isoform 1 [Homo sapiens]                        | JQ425154.1                    | GCTTCACTCAAAGATCAAATCTACAGA | TTAGAGCAAACCTCCACATTTGTATGG  |
| <i>Smed-fgfr-1</i>  | fibroblast growth factor receptor 1 isoform 14 precursor [Homo sapiens] | JQ425160.1                    | CATCCAATAAGTGCGCTTCTCTT     | CAGTGGAAGCTCCAGAATTGAAA      |

**Table S2.** Selected gene groups for RT-PCR analysis of oxidative stress response genes.

| Gene name | Description | Schmidtea<br>mediterranea<br>genome<br>database<br>(SmedGD) | Primer F | Primer R |
|-----------|-------------|-------------------------------------------------------------|----------|----------|
|-----------|-------------|-------------------------------------------------------------|----------|----------|

|                    |                                                                            | Reference<br>Sequence |                             |                               |
|--------------------|----------------------------------------------------------------------------|-----------------------|-----------------------------|-------------------------------|
| <i>Smed-gss</i>    | glutathione synthetase [Homo sapiens]                                      | SMU15015253           | TGCGCAGCAAACCGACTA          | GCTATCGATGCATCCAAATCC         |
| <i>Smed-gpx4</i>   | glutathione peroxidase 4 (phospholipid hydroperoxidase) [Homo sapiens]     | SMU15039906           | AAGGCGATGTTGTACTCGTTGTT     | GAAGCTTATGCAACTCCTGCAA        |
| <i>Smed-alh2</i>   | mitochondrial aldehyde dehydrogenase 2 [Homo sapiens]                      | SMU15017380           | AGGACATCGACAAATCTTTGCA      | GTTTGGGTGAATTGCTATGACGTA      |
| <i>Smed-prx6</i>   | peroxiredoxin-6 [Homo sapiens]                                             | SMU15002827           | ATAGCTGACACGGATCGAGATCT     | GGATCAAGGAAGTAAACAGCTCTTG     |
| <i>Smed-txn</i>    | thioredoxin [Homo sapiens]                                                 | SMU15025476           | TGGCTTCTTGTGATAAGTTAATTGTTG | CGAAAACGACGTCAGGAAATTC        |
| <i>Smed-txnrd1</i> | thioredoxin reductase 1 [Homo sapiens]                                     | SMU15008405           | GGTGGTCGGTGGTAGCTATGTAG     | GAACCATAACGGTCGTATCACATC      |
| <i>Smed-sod1</i>   | superoxide dismutase [Cu-Zn] [Homo sapiens]                                | SMU15030255           | TGCACGAATGGCGAGATAATTA      | TCCAATAACTCCACAAGCTACTCTTC    |
| <i>Smed-pgd</i>    | 6-phosphogluconate dehydrogenase, decarboxylating isoform 1 [Homo sapiens] | SMU15001176           | TTCACGCAAACGTCAACATGTAT     | GCATATCACCATTGCAATTGGA        |
| <i>Smed-taldo</i>  | TALDO1 protein [Homo sapiens]                                              | SMU15040687           | CCAGGCCGTCGCATGT            | GCCAATCATAAATTCTACCGACAA      |
| <i>Smed-tkt</i>    | transketolase isoform 1 [Homo sapiens]                                     | SMU15039542           | CGATGAGGAGTTGCTGAGGAA       | GGGAAATGATCCTCGACAGTGA        |
| <i>Smed-fth</i>    | FTH1 protein [Homo sapiens]                                                | SMU15023437           | GAGAAACCAGCCAAAACGTATTG     | TCTGTCAAGTGTGGATCAAAATGA      |
| <i>Smed-gsts</i>   | glutathione S-transferase omega-1 isoform 1 [Homo sapiens]                 | SMU15007045           | GAACCGAAAGTTGATCGAAGTAAAC   | CATGTTCAATTCCATGGTGAGATAA     |
| <i>Smed-ptk1</i>   | protein kinase 1 [Homo sapiens]                                            | SMU30003323           | CAATCAGTCCATGCCTGACTTG      | GGTTGTGATAGTTCATAGTATGGTTTTGA |
| <i>Smed-gr2</i>    | glutathione-disulfide reductase [Homo sapiens]                             | SMU15030732           | CGACAGAAAATCCCTGTAGCATT     | ATTTGTTTGCTTCCCGATGAA         |
| <i>Smed-ugt2b7</i> | UDP-glucuronosyltransferase 2B7 isoform 1 precursor [Homo sapiens]         | SMU15001980           | TTTAATATTGAGCATTCCGATGGA    | CAGACCTGTGAAATGTCAATAACGT     |
| <i>Smed-g6pd</i>   | glucose-6-phosphate 1-dehydrogenase isoform b [Homo sapiens]               | SMU15012454           | AACCCGGTGAGGCGATTTAT        | AACGTCATTGAGTCGCCAGTT         |
| <i>Smed-cat</i>    | catalase [Homo sapiens]                                                    | SMU15017976           | GGCTCATTTTGACCGAGAAAGA      | GCACTCAAAGAAACCGAAAGCT        |
| <i>Smed-3705</i>   | kelch like ECH associated protein 1 [Homo sapiens]                         | SMU15003705           | AGATTATCCAGTGACACCTTTGCA    | CCAGATTTTCCAGCGTCCAT          |
| <i>Smed-9751</i>   | kelch-like protein 20 [Homo sapiens]                                       | SMU15039751           | TGATGTGCAGCAAAATGAGAAA      | CCAGACAGAGACTTTGAAGGTGACT     |
| <i>Smed-pgd</i>    | 6-phosphogluconate dehydrogenase, decarboxylating isoform 1 [Homo sapiens] | SMU15001176           | TTCACGCAAACGTCAACATGTAT     | GCATATCACCATTGCAATTGGA        |

|                  |                                                                       |             |                            |                          |
|------------------|-----------------------------------------------------------------------|-------------|----------------------------|--------------------------|
| <i>Smed-gcl</i>  | glutamate--cysteine ligase catalytic subunit isoform a [Homo sapiens] | SMU15001870 | AATGGATCGAACCAGCATAATACTG  | GACCATATGGATAGCCTGGAACTC |
| <i>Smed-bmp</i>  | BMP8A protein [Homo sapiens]                                          | SMU15037612 | CCATCAGAGAAAGTTCGCAGTAATTT | TGAGGCAATTTTTCCGACAAT    |
| <i>Smed-alh1</i> | aldehyde dehydrogenase 1A1 [Homo sapiens]                             | SMU15001870 | GGAGTTTGTTTCAGCGGGTTTAA    | TTCATGCTGGCTGTTTTCAAATT  |

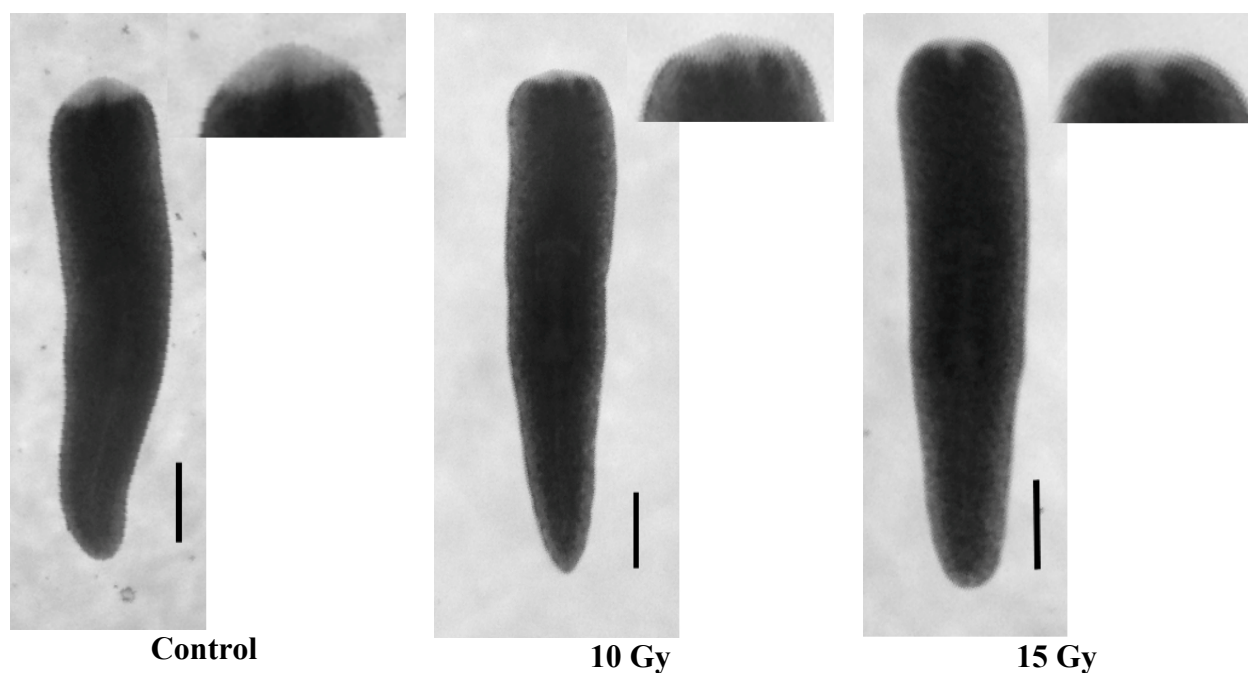

**Figure S1.** The representative photographs of regenerating planarians for blasthema growth rate analysis by means of computer morphometry. Depicted are planarians on third day after decapitation, the control and planarians after X-ray irradiation with doses of 10 and 15 Gy. Bar – 1 mm

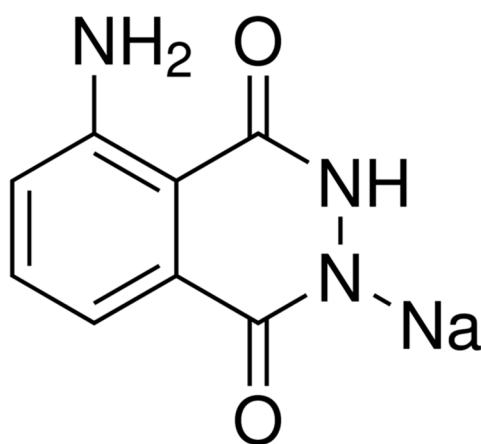

**Figure S2.** Structural chemical formula of Tameron (5-amino-2,3-dihydro-1,4-phthalazinedione sodium salt).

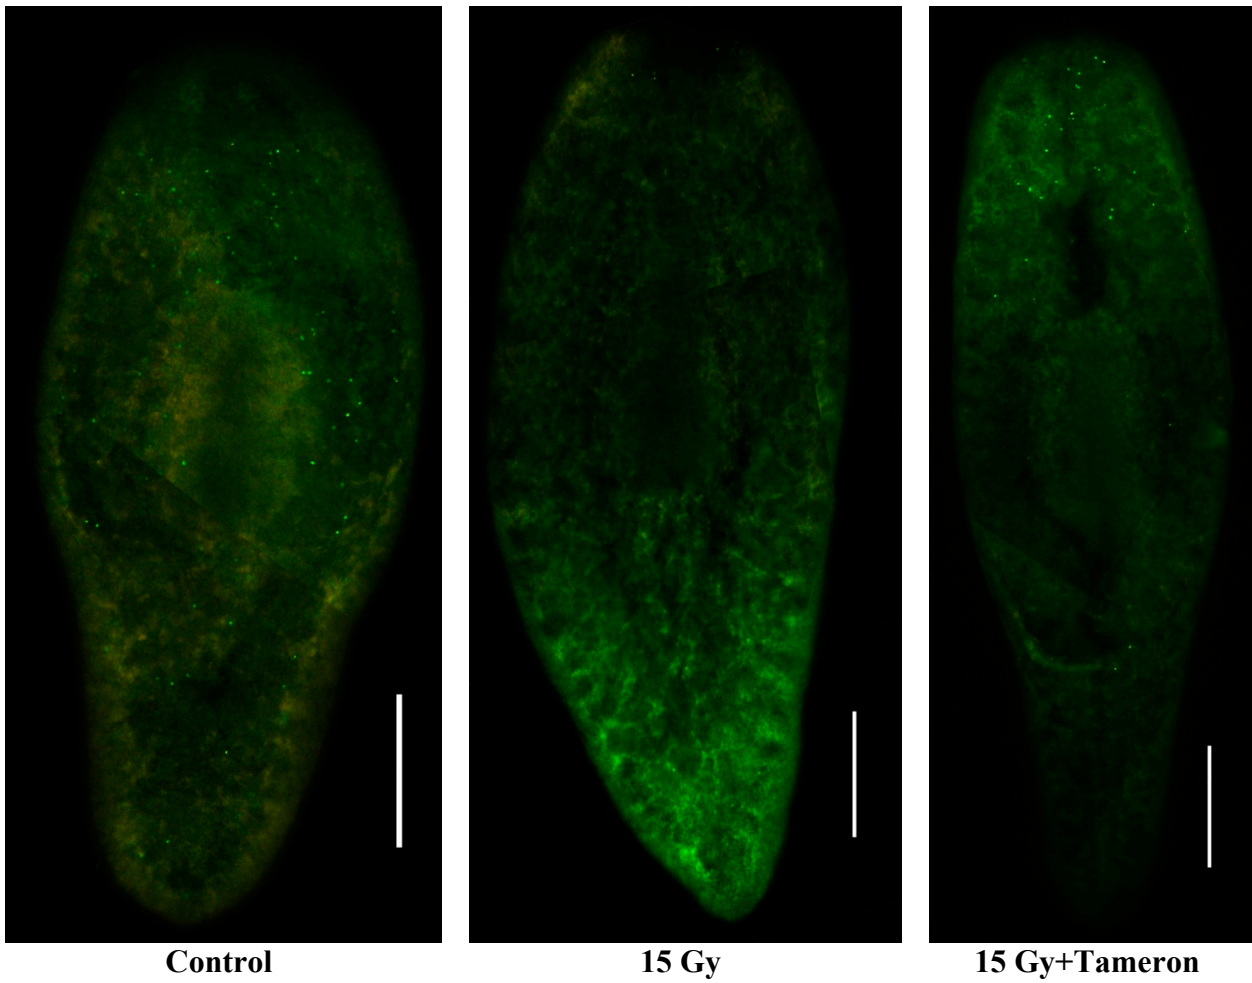

**Figure S3.** Mitotic cells in planarian bodies (whole-mount Immunocytochemistry) 7 days after 15 Gy irradiation. Bar – 1 mm
